# Supplementary material
Source: Springer Nature journal article supplement (https://www.springermedizin.de/resource/supplementary/12967_2012_1368_MOESM2_ESM.pdf/9573466)

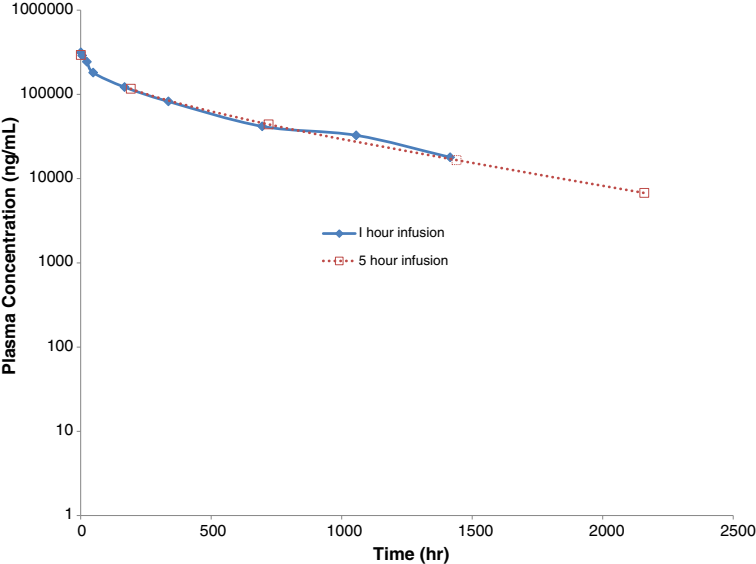

Supplement: MOESM2 [file 9573466]
